# Supplementary material for: Comprehensive Detoxification Mechanism Assessment of Red Imported Fire Ant (Solenopsis invicta) against Indoxacarb
Source: MDPI journal article supplement (doi:10.3390/molecules27030870), 2022-01-27
Supplement: s1 [file s1]

# Comprehensive detoxification mechanism assessment of red imported fire ant (*Solenopsis invicta*) against indoxacarb

Junaid Ali Siddiqui <sup>1</sup>, Yuping Zhang <sup>2\*</sup>, Yuanyuan Luo <sup>3</sup>, Bamisope Steve Bamisile <sup>1</sup>, Naveed Ur Rehman <sup>4</sup>, Waqar Islam <sup>5,6</sup>, Muhammad Qasim <sup>7</sup>, Qiuying Jiang <sup>1</sup>, and Yijuan Xu <sup>1\*</sup>

<sup>1</sup> Department of Entomology, South China Agricultural University, Guangzhou, 510642, China. junaidali206@scau.edu.cn; junaidali206@gmail.com (J.A.S.); bamisopebamisile@yahoo.com (B.S.B.); 958863518@qq.com (Q. J.); xuyijuan@yahoo.com (Y.X.)

<sup>2</sup> Plant Protection Research Institute, Guangdong Academy of Agricultural Sciences, Guangdong Provincial Key Laboratory of High Technology for Plant Protection, Guangzhou 510640, China. zhangyp@gdppri.cn (Y.Z.)

<sup>3</sup> Institute for the Control of Agrochemicals, Ministry of Agriculture and Rural Affairs, Beijing 100125, China. 294455581@qq.com (Y.L.)

<sup>4</sup> State Key Laboratory for Conservation and Utilization of Subtropical Agro-Bioresources, Guangdong Provincial Key Laboratory of Plant Molecular Breeding, South China Agricultural University, Guangzhou 510642, China; naveed@scau.edu.cn (N.U.R.)

<sup>5</sup> State Key Laboratory of Desert and Oasis Ecology, Xinjiang Institute of Ecology and Geography, Chinese Academy of Sciences, Urumqi 830011, China; Ddoapsial@yahoo.com

<sup>6</sup> University of Chinese Academy of Science, Beijing 100049, China.

<sup>7</sup> Department of Agriculture and Forestry, Kohsar University Murree, 47150, Punjab, Pakistan. mqasim@kum.edu.cn (M.Q.)

\* Correspondence: xuyijuan@yahoo.com; zhangyp@gdppri.cn

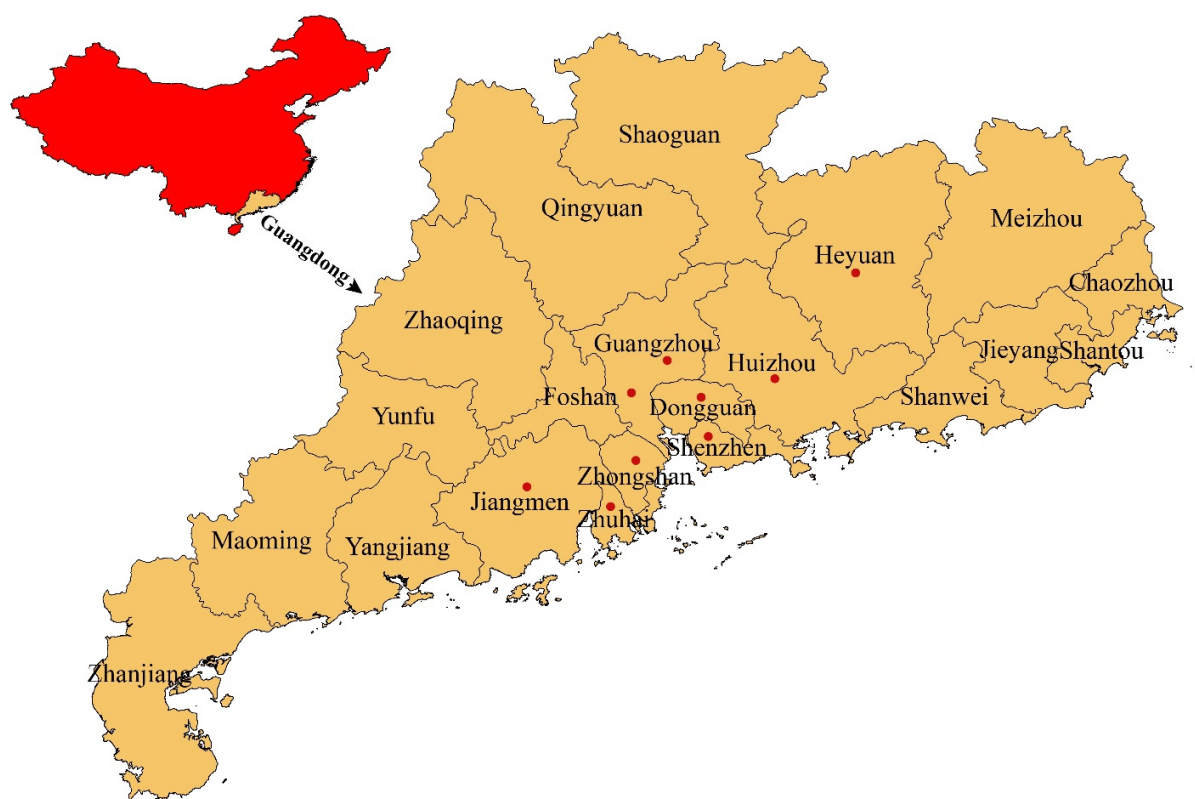

**Figure S1.** Collection sites of *Solenopsis invicta* (Coloured areas with red spots).

**Table S1.** List of forward and reverse primers used in qPCR

| Genes                 | NR ID        | Forward primer        | Reverse primer        |
|-----------------------|--------------|-----------------------|-----------------------|
| LOC105194093 (desat1) | XM_026137651 | TGCAATAAAAACCGAAAAGT  | TTAACCCGGAAGATACACAG  |
| LOC105197000 (D11DS)  | XM_039449512 | CAAGATCGGCTGGGCCTACG  | CCTTGGTGTGGTGGTGGGTC  |
| LOC105201459 (CA1)    | XM_011169477 | TGGAGGGAGGAGGAGCCCTA  | CGATCTGGCTGCCGTAGTGG  |
| LOC105201461 (cahz)   | XM_011169479 | CGAGTGCCTGAAGCAGAGGG  | GGGATCTTGGTCTCGCTGCC  |
| LOC105200011 (D11DS)  | XM_026132620 | TGTACGTGATCGGCGGCTTC  | TCCTGTGGTCCCTCACCCAG  |
| LOC105201491 (CA1)    | XM_011169518 | ACGTGGTGAGCAACCTGTGG  | CTCCTGCTGCACGATCCAGG  |
| LOC105194705 (CPB2)   | XM_011159765 | TGGTGTTCGTGGTGGACGTG  | AAGATGTCGGCGATGCTGGG  |
| LOC105194841 (cNs)    | XM_039449217 | CGACCTGGTGATCATGCCCC  | GCTCGATGGGGTTCAGGTCTG |
| LOC105200010 (D11DS)  | XM_039449353 | CCGACGTGAAGGAGAAGGGC  | GCTCGGCGGTCTTGTAGTCC  |
| LOC105200009 (ACD)    | XM_011167361 | CTTCAAGGACGGCACCCCTGG | GGGGGCCACTTGCTGATCTC  |

**Table S2.** List of genes of interest with fold change.

| Gene of Interest | Gene ID      | log2 (fold change) |
|------------------|--------------|--------------------|
| desat1           | LOC105194093 | 6.64385619         |
| D11DS            | LOC105197000 | 5.437405312        |
| CA1              | LOC105201459 | 5.196397213        |
| cahz             | LOC105201461 | 5.196397213        |
| D11DS            | LOC105200011 | 4.544320516        |
| CA1              | LOC105201491 | -1.204358499       |
| CPB2             | LOC105194705 | -1.670898387       |
| cNs              | LOC105194841 | -1.925999419       |
| D11DS            | LOC105200010 | -2.115477217       |
| ACD              | LOC105200009 | -5.984893108       |

**Table S3.** List of DEGs involving insecticide-related metabolic pathways

| Gene ID      | Gene description                                                                                               | Fold change |
|--------------|----------------------------------------------------------------------------------------------------------------|-------------|
| MSTRG.9167   | LOW QUALITY PROTEIN: carboxylesterase 4A-like [Ooceraea biroi]                                                 | 5.644       |
| LOC105197650 | carboxylesterase 5A [Source:RefSeq mRNA;Acc:XM_011164120.1]                                                    | 0.426       |
| LOC105196831 | liver carboxylesterase-like [Source:RefSeq mRNA;Acc:XM_011162963.1]                                            | 0.217       |
| LOC105204441 | venom carboxylesterase-6-like [Source:RefSeq mRNA;Acc:XM_011173516.1]                                          | 0.125       |
| LOC105194124 | venom carboxylesterase-6-like [Source:RefSeq mRNA;Acc:XM_011158865.1]                                          | 0.065       |
| LOC105197400 | venom carboxylesterase-6, transcript variant X1 [Source:RefSeq mRNA;Acc:XM_011163721.1]                        | 0.056       |
| LOC105196374 | liver carboxylesterase 2-like [Source:RefSeq mRNA;Acc:XM_011162296.1]                                          | -0.052      |
| LOC105194860 | venom carboxylesterase-6-like [Source:RefSeq mRNA;Acc:XM_011159974.1]                                          | -0.089      |
| LOC105202371 | acetylcholinesterase-like, transcript variant X1 [Source:RefSeq mRNA;Acc:XM_011170846.1]                       | 0.304       |
| LOC105193078 | acetylcholinesterase-like [Source:RefSeq mRNA;Acc:XM_011157408.1]                                              | 0.940       |
| LOC105199995 | glutathione S-transferase-like [Source:RefSeq mRNA;Acc:XM_011167343.1]                                         | 0.886       |
| LOC105199993 | glutathione S-transferase-like [Source:RefSeq mRNA;Acc:XM_011167341.1]                                         | 0.280       |
| LOC105195447 | glutathione S-transferase theta-1-like, transcript variant X5 [Source:RefSeq mRNA;Acc:XM_011160838.1]          | 0.212       |
| LOC105195113 | microsomal glutathione S-transferase 1-like [Source:RefSeq mRNA;Acc:XM_011160360.1]                            | 0.148       |
| LOC105197561 | glutathione S-transferase-like [Source:RefSeq mRNA;Acc:XM_011163987.1]                                         | 0.087       |
| LOC105207856 | glutathione S-transferase D4-like [Source:RefSeq mRNA;Acc:XM_011177540.1]                                      | 0.085       |
| LOC105201720 | glutathione S-transferase 1-like [Source:RefSeq mRNA;Acc:XM_011169880.1]                                       | -0.017      |
| LOC105199994 | glutathione S-transferase-like [Source:RefSeq mRNA;Acc:XM_011167342.1]                                         | -0.051      |
| LOC105200001 | glutathione S-transferase-like [Source:RefSeq mRNA;Acc:XM_011167348.1]                                         | -0.178      |
| LOC105200000 | glutathione S-transferase-like [Source:RefSeq mRNA;Acc:XM_011167347.1]                                         | -0.188      |
| LOC105202328 | glutathione S-transferase-like [Source:RefSeq mRNA;Acc:XM_011170779.1]                                         | -0.287      |
| LOC105196690 | glutathione S-transferase C-terminal domain-containing protein homolog [Source:RefSeq mRNA;Acc:XM_011162741.1] | -0.310      |
| MSTRG.9849   | glutathione S-transferase 1-like [ <i>Solenopsis invicta</i> ]                                                 | -0.486      |

**Table S4.** List of genes and gene expression in control and after LC<sub>30</sub> application specifically related to insecticide detoxification.

| SR. No                    | Gene ID      | NR Discription                                                                                                 | FPKM     | FPKM     |
|---------------------------|--------------|----------------------------------------------------------------------------------------------------------------|----------|----------|
|                           |              |                                                                                                                | Control  | LC30     |
| Acetylcholinesterase      |              |                                                                                                                |          |          |
| 1                         | MSTRG.9167   | LOW QUALITY PROTEIN: carboxylesterase 4A-like [Ooceraea biro]                                                  | 0.001    | 0.05     |
| 2                         | LOC105197650 | carboxylesterase 5A [Source:RefSeq mRNA;Acc:XM_011164120.1]                                                    | 3.01     | 4.043333 |
| 3                         | LOC105196831 | liver carboxylesterase-like [Source:RefSeq mRNA;Acc:XM_011162963.1]                                            | 34.11    | 39.64667 |
| 4                         | LOC105204441 | venom carboxylesterase-6-like [Source:RefSeq mRNA;Acc:XM_011173516.1]                                          | 27.69667 | 30.19333 |
| 5                         | LOC105194124 | venom carboxylesterase-6-like [Source:RefSeq mRNA;Acc:XM_011158865.1]                                          | 34.07    | 35.64    |
| 6                         | LOC105197400 | venom carboxylesterase-6, transcript variant X1 [Source:RefSeq mRNA;Acc:XM_011163721.1]                        | 45.75    | 47.57667 |
| 7                         | LOC105196374 | liver carboxylesterase 2-like [Source:RefSeq mRNA;Acc:XM_011162296.1]                                          | 10.63    | 10.25333 |
| 8                         | LOC105194860 | venom carboxylesterase-6-like [Source:RefSeq mRNA;Acc:XM_011159974.1]                                          | 65.45    | 61.54333 |
| Carboxylesterase          |              |                                                                                                                |          |          |
| 1                         | LOC105202371 | acetylcholinesterase-like, transcript variant X1 [Source:RefSeq mRNA;Acc:XM_011170846.1]                       | 2.55     | 3.423333 |
| 2                         | LOC105193078 | acetylcholinesterase-like [Source:RefSeq mRNA;Acc:XM_011157408.1]                                              | 1.2      | 1.21     |
| Glutathione-S-transferase |              |                                                                                                                |          |          |
| 1                         | LOC105199995 | glutathione S-transferase-like [Source:RefSeq mRNA;Acc:XM_011167343.1]                                         | 0.153333 | 0.283333 |
| 2                         | LOC105199993 | glutathione S-transferase-like [Source:RefSeq mRNA;Acc:XM_011167341.1]                                         | 77.78    | 94.47    |
| 3                         | LOC105195447 | glutathione S-transferase theta-1-like, transcript variant X5 [Source:RefSeq mRNA;Acc:XM_011160838.1]          | 355.5933 | 411.7667 |
| 4                         | LOC105195113 | microsomal glutathione S-transferase 1-like [Source:RefSeq mRNA;Acc:XM_011160360.1]                            | 152.4767 | 168.99   |
| 5                         | LOC105197561 | glutathione S-transferase-like [Source:RefSeq mRNA;Acc:XM_011163987.1]                                         | 1306.023 | 1387.273 |
| 6                         | LOC105207856 | glutathione S-transferase D4-like [Source:RefSeq mRNA;Acc:XM_011177540.1]                                      | 19.97667 | 21.18333 |
| 7                         | LOC105201720 | glutathione S-transferase 1-like [Source:RefSeq mRNA;Acc:XM_011169880.1]                                       | 8.626667 | 8.526667 |
| 8                         | LOC105199994 | glutathione S-transferase-like [Source:RefSeq mRNA;Acc:XM_011167342.1]                                         | 111.0567 | 107.2067 |
| 9                         | LOC105200001 | glutathione S-transferase-like [Source:RefSeq mRNA;Acc:XM_011167348.1]                                         | 11.31333 | 10.00333 |
| 10                        | LOC105200000 | glutathione S-transferase-like [Source:RefSeq mRNA;Acc:XM_011167347.1]                                         | 150.24   | 131.8467 |
| 11                        | LOC105202328 | glutathione S-transferase-like [Source:RefSeq mRNA;Acc:XM_011170779.1]                                         | 0.573333 | 0.47     |
| 12                        | LOC105196690 | glutathione S-transferase C-terminal domain-containing protein homolog [Source:RefSeq mRNA;Acc:XM_011162741.1] | 15.16    | 12.22667 |
| 13                        | MSTRG.9849   | glutathione S-transferase 1-like [Solenopsis invicta]                                                          | 1.456667 | 1.04     |

**Table S5.** List of the raw and clean reads of all samples.

| Sample         | Raw Read           | Clean Read         |
|----------------|--------------------|--------------------|
| Ind-C1         | 48447166           | 48347126           |
| Ind-C2         | 46554290           | 46447634           |
| Ind-C3         | 47653952           | 47528044           |
| <b>Average</b> | <b>47551802.67</b> | <b>47440934.67</b> |
| Ind-30-1       | 43807734           | 43711698           |
| Ind-30-2       | 51239578           | 51134350           |
| Ind-30-3       | 58207038           | 57965708           |
| <b>Average</b> | <b>51084783.33</b> | <b>50937252</b>    |

**Table S6.** List of base pairs before filters and after filter along with raw and clear data

| Sample           | RawData(bp) | BF_Q30(%)           | BF_GC(%)            | CleanData(bp) | AF_Q30 (%)          | AF_GC (%)           |
|------------------|-------------|---------------------|---------------------|---------------|---------------------|---------------------|
| <b>Ind-C1</b>    | 7267074900  | 6854514003 (94.32%) | 2721495543 (37.45%) | 7225022371    | 6823226712 (94.44%) | 2699768226 (37.37%) |
| <b>Ind-C2</b>    | 6983143500  | 6563440512 (93.99%) | 2681338745 (38.40%) | 6931556820    | 6524564819 (94.13%) | 2654540978 (38.30%) |
| <b>Ind-C3</b>    | 7148092800  | 6747257693 (94.39%) | 3196895986 (44.72%) | 7098409469    | 6710169406 (94.53%) | 3169643175 (44.65%) |
| <b>Ind-L30-1</b> | 6571160100  | 6209764858 (94.50%) | 2652270388 (40.36%) | 6527487090    | 6176793042 (94.63%) | 2629368120 (40.28%) |
| <b>Ind-L30-2</b> | 7685936700  | 7262561510 (94.49%) | 3111302556 (40.48%) | 7626863460    | 7216886462 (94.62%) | 3080613856 (40.39%) |
| <b>Ind-L30-3</b> | 8731055700  | 8142416305 (93.26%) | 3490602494 (39.98%) | 8646724452    | 8082609363 (93.48%) | 3447643516 (39.87%) |

**Table S7.** List of significant DEGs annotations related to insecticide detoxification.

| ID           | Description                                                                                                            | log2(fc)        | P-Value  |
|--------------|------------------------------------------------------------------------------------------------------------------------|-----------------|----------|
| LOC105198422 | XP_011163427.1 uncharacterized protein LOC105198422 [ <i>Solenopsis invicta</i> ]                                      | -2.00012322     | 1.28E-47 |
| LOC105198854 | mpv17-like protein 2 [Source:RefSeq mRNA;Acc:XM_011165698.1]                                                           | 1.51798535<br>2 | 1.59E-39 |
| LOC105194589 | synaptic vesicle glycoprotein 2B-like [Source:RefSeq mRNA;Acc:XM_011159572.1]                                          | 2.43808553<br>8 | 7.52E-32 |
| LOC105201375 | myc-associated zinc finger protein [Source:RefSeq mRNA;Acc:XM_011169370.1]                                             | -2.0349442      | 4.95E-27 |
| LOC105204027 | heat shock protein 83 [Source:RefSeq mRNA;Acc:XM_011173022.1]                                                          | -1.33403097     | 8.44E-27 |
| LOC105195283 | alkaline phosphatase 4-like, transcript variant X2 [Source:RefSeq mRNA;Acc:XM_011160655.1]                             | -3.60019227     | 8.86E-19 |
| LOC105197404 | cytochrome P450 6k1-like, transcript variant X3 [Source:RefSeq mRNA;Acc:XM_011163732.1]                                | 1.59493745<br>3 | 1.60E-12 |
| LOC105203274 | growth/differentiation factor 8, transcript variant X2 [Source:RefSeq mRNA;Acc:XM_011172052.1]                         | 1.24125408<br>6 | 3.42E-12 |
| LOC105194316 | XP_011157475.1 uncharacterized protein LOC105194316 isoform X1 [ <i>Solenopsis invicta</i> ]                           | -1.04578417     | 8.90E-12 |
| LOC105200780 | UDP-glucuronosyltransferase 3A1-like [Source:RefSeq mRNA;Acc:XM_011168499.1]                                           | 1.63231216<br>1 | 3.41E-11 |
| LOC105200109 | rhythmically expressed gene 5 protein [Source:RefSeq mRNA;Acc:XM_011167503.1]                                          | 1.13564856<br>4 | 7.19E-11 |
| LOC105198588 | lipase 3-like [Source:RefSeq mRNA;Acc:XM_011165343.1]                                                                  | 1.18275490<br>2 | 1.50E-10 |
| LOC105193464 | XP_011156219.1 uncharacterized protein LOC105193464 [ <i>Solenopsis invicta</i> ]                                      | 2.14457557<br>2 | 1.55E-10 |
| LOC105207901 | XP_011175889.1 uncharacterized protein LOC105207901 [ <i>Solenopsis invicta</i> ]                                      | 1.65743561<br>2 | 2.19E-10 |
| LOC105194676 | voltage-dependent L-type calcium channel subunit beta-2, transcript variant X5 [Source:RefSeq mRNA;Acc:XM_011159729.1] | 1.17618878<br>7 | 9.90E-10 |
| LOC105196774 | XP_011161179.1 uncharacterized protein LOC105196774 [ <i>Solenopsis invicta</i> ]                                      | -1.31403627     | 2.38E-09 |
| LOC105200857 | XP_011166938.1 uncharacterized protein LOC105200857 [ <i>Solenopsis invicta</i> ]                                      | -1.49540839     | 3.16E-09 |
| LOC105194877 | serine/threonine-protein kinase grp, transcript variant X2 [Source:RefSeq mRNA;Acc:XM_011160001.1]                     | -1.11773485     | 3.26E-09 |

|                 |                                                                                                                            |                 |          |
|-----------------|----------------------------------------------------------------------------------------------------------------------------|-----------------|----------|
| LOC105202983    | XP_011169982.1 uncharacterized protein LOC105202983, partial [ <i>Solenopsis invicta</i> ]                                 | -1.92625306     | 3.88E-09 |
| LOC105204662    | XP_011172130.1 uncharacterized protein LOC105204662 [ <i>Solenopsis invicta</i> ]                                          | 1.30976545<br>6 | 4.04E-09 |
| LOC105207862    | nuclear pore complex protein Nup160 homolog [Source:RefSeq mRNA;Acc:XM_011177508.1]                                        | -1.12418917     | 4.26E-09 |
| LOC105199272    | RNA-directed DNA polymerase from mobile element jockey-like, transcript variant X2 [Source:RefSeq mRNA;Acc:XM_011166279.1] | 1.59941816<br>4 | 4.55E-09 |
| LOC105203338    | XP_025994720.1 uncharacterized protein LOC105203338 [ <i>Solenopsis invicta</i> ]                                          | 1.29142058<br>9 | 5.13E-09 |
| LOC105200010    | acyl-CoA Delta(11) desaturase, transcript variant X1 [Source:RefSeq mRNA;Acc:XM_011167362.1]                               | -1.67089839     | 5.35E-09 |
| LOC105196458    | DNA ligase 1-like [Source:RefSeq mRNA;Acc:XM_011162405.1]                                                                  | 1.34203314<br>8 | 7.46E-09 |
| LOC105201911    | histone-lysine N-methyltransferase SETMAR-like [Source:RefSeq mRNA;Acc:XM_011170190.1]                                     | 1.47164986<br>7 | 1.04E-08 |
| LOC105197030    | XP_025995677.1 uncharacterized protein LOC105197030 isoform X2 [ <i>Solenopsis invicta</i> ]                               | -1.74723393     | 8.54E-08 |
| LOC105202384    | cysteine sulfinic acid decarboxylase [Source:RefSeq mRNA;Acc:XM_011170867.1]                                               | -1.17191398     | 1.36E-07 |
| LOC105205726    | dorsalin-1-like [Source:RefSeq mRNA;Acc:XM_011175216.1]                                                                    | 1.57571018<br>7 | 1.49E-07 |
| LOC105192918    | fatty acid synthase-like [Source:RefSeq mRNA;Acc:XM_011157205.1]                                                           | -1.3014719      | 1.58E-07 |
| LOC105201875    | XP_011168444.1 uncharacterized protein LOC105201875 [ <i>Solenopsis invicta</i> ]                                          | 1.76953057<br>4 | 2.74E-07 |
| NC_014672.1-ND3 | ND3 NADH dehydrogenase subunit 3 [ <i>Solenopsis invicta</i> (red fire ant) -                                              | -1.09665645     | 2.80E-07 |
| LOC105193936    | aminopeptidase N-like [Source:RefSeq mRNA;Acc:XM_011158626.1]                                                              | 1.46200715<br>7 | 5.74E-07 |
| LOC105204328    | fatty acid synthase-like [Source:RefSeq mRNA;Acc:XM_011173377.1]                                                           | -1.32297542     | 6.33E-07 |
| LOC105207756    | XP_011175696.1 uncharacterized protein LOC105207756 isoform X1 [ <i>Solenopsis invicta</i> ]                               | 1.29005445<br>3 | 7.97E-07 |
| LOC105196694    | probable salivary secreted peptide [Source:RefSeq mRNA;Acc:XM_011162746.1]                                                 | 1.56452459      | 8.41E-07 |
| LOC105200309    | peritrophin-1-like [Source:RefSeq mRNA;Acc:XM_011167786.1]                                                                 | 1.72938107<br>4 | 1.05E-06 |
| LOC105206355    | XP_025994997.1 uncharacterized protein LOC105206355 [ <i>Solenopsis invicta</i> ]                                          | 1.97949232<br>2 | 1.13E-06 |
| LOC105198220    | esterase E4-like [Source:RefSeq mRNA;Acc:XM_011164877.1]                                                                   | 1.41799081<br>7 | 1.45E-06 |
| LOC105195396    | PBAN-type neuropeptides-like [Source:RefSeq mRNA;Acc:XM_011160774.1]                                                       | 1.11091882<br>6 | 1.49E-06 |
| LOC105205291    | XP_025986450.1 putative aminopeptidase-2 [ <i>Solenopsis invicta</i> ]                                                     | 1.23062628<br>5 | 1.95E-06 |



|              |                                                                                               |                 |          |
|--------------|-----------------------------------------------------------------------------------------------|-----------------|----------|
| MSTRG.17342  | oxidoreductase ptaE-like [ <i>Solenopsis invicta</i> ]                                        | 1.50502086<br>1 | 2.31E-06 |
| LOC105200093 | chymotrypsin-2-like [Source:RefSeq mRNA;Acc:XM_011167468.1]                                   | 2.27623176      | 2.44E-06 |
| LOC105197108 | aminopeptidase N [Source:RefSeq mRNA;Acc:XM_011163339.1]                                      | 1.84957202<br>4 | 2.48E-06 |
| LOC105201710 | cytochrome b5-like, transcript variant X4 [Source:RefSeq mRNA;Acc:XM_011169860.1]             | 1.41078564<br>1 | 2.55E-06 |
| LOC105202141 | homeobox protein Nkx-2.5-like, transcript variant X1 [Source:RefSeq mRNA;Acc:XM_011170530.1]  | 1.60660015      | 2.97E-06 |
| LOC105202620 | XP_025996942.1 endothelin-converting enzyme 1-like [ <i>Solenopsis invicta</i> ]              | -1.83995959     | 3.10E-06 |
| LOC105193305 | chymotrypsin-1-like [Source:RefSeq mRNA;Acc:XM_011157712.1]                                   | 2.15183275<br>3 | 3.14E-06 |
| LOC105196223 | ATP-dependent RNA helicase ddx24 [Source:RefSeq mRNA;Acc:XM_011162031.1]                      | -1.29849453     | 3.25E-06 |
| LOC105205908 | chymotrypsin-2-like [Source:RefSeq mRNA;Acc:XM_011175449.1]                                   | 1.58146526<br>7 | 3.52E-06 |
| LOC105196063 | 4-coumarate--CoA ligase 1-like, transcript variant X1 [Source:RefSeq mRNA;Acc:XM_011161786.1] | 1.77495252<br>4 | 4.99E-06 |
| LOC105196697 | probable salivary secreted peptide [Source:RefSeq mRNA;Acc:XM_011162749.1]                    | 1.47706675      | 5.27E-06 |
| LOC105193271 | chymotrypsin-1-like, transcript variant X2 [Source:RefSeq mRNA;Acc:XM_011157653.1]            | 1.25569843      | 6.57E-06 |
| LOC105208007 | 15-hydroxyprostaglandin dehydrogenase [NAD(+)]-like [Source:RefSeq mRNA;Acc:XM_011177726.1]   | -1.06959199     | 7.07E-06 |
| LOC105204092 | tetraspanin-1-like, transcript variant X1 [Source:RefSeq mRNA;Acc:XM_011173138.1]             | 1.69214623<br>5 | 8.91E-06 |
| LOC105196696 | probable salivary secreted peptide [Source:RefSeq mRNA;Acc:XM_011162748.1]                    | 1.51678452<br>8 | 9.30E-06 |
| LOC105196469 | protein mesh, transcript variant X2 [Source:RefSeq mRNA;Acc:XM_011162424.1]                   | 1.12887090<br>5 | 1.16E-05 |
| LOC105201877 | XP_011168446.1 uncharacterized protein LOC105201877 [ <i>Solenopsis invicta</i> ]             | 1.30335186<br>1 | 1.16E-05 |
| LOC105203737 | lipoyltransferase 1, mitochondrial [Source:RefSeq mRNA;Acc:XM_011172620.1]                    | -1.14692649     | 1.26E-05 |
| LOC105207450 | XP_011175203.1 uncharacterized protein LOC105207450 [ <i>Solenopsis invicta</i> ]             | 1.02958760<br>1 | 1.37E-05 |
| LOC105202179 | fatty acid synthase-like [Source:RefSeq mRNA;Acc:XM_011170571.1]                              | -1.52048041     | 1.49E-05 |
| LOC105199036 | odorant receptor coreceptor [Source:RefSeq mRNA;Acc:XM_011165941.1]                           | 1.74293949<br>5 | 1.61E-05 |
| LOC105194954 | COUP transcription factor 2-like [Source:RefSeq mRNA;Acc:XM_011160090.1]                      | 1.96736279<br>2 | 1.86E-05 |
| LOC105199217 | sulfotransferase 4A1-like, transcript variant X2 [Source:RefSeq mRNA;Acc:XM_011166200.1]      | 1.04004226<br>9 | 2.02E-05 |
| LOC105200310 | XP_025995879.1 uncharacterized protein LOC105200311 [ <i>Solenopsis invicta</i> ]             | 1.46299414<br>4 | 2.05E-05 |

|              |                                                                                                           |                  |                 |
|--------------|-----------------------------------------------------------------------------------------------------------|------------------|-----------------|
| LOC105197985 | chymotrypsin-1 [Source:RefSeq mRNA;Acc:XM_011164597.1]                                                    | 1.31070624<br>6  | 2.24E-05        |
| LOC105199250 | XP_025993743.1 mucin-3A [ <i>Solenopsis invicta</i> ]                                                     | -3.7548875       | 2.45E-05        |
| LOC105200663 | DDB1- and CUL4-associated factor 8-like, transcript variant X1 [Source:RefSeq mRNA;Acc:XM_011168312.1]    | 1.41897821<br>5  | 2.58E-05        |
| LOC105205233 | histone-lysine N-methyltransferase SMYD3-like, transcript variant X2 [Source:RefSeq mRNA;Acc:XR_851275.1] | 1.47458422<br>9  | 2.73E-05        |
| LOC105193841 | alpha-glucosidase-like [Source:RefSeq mRNA;Acc:XM_011158466.1]                                            | 1.70398488<br>9  | 2.80E-05        |
| LOC105192910 | acyl-CoA Delta(11) desaturase-like [Source:RefSeq mRNA;Acc:XM_011157198.1]                                | 2.05163276<br>8  | 2.86E-05        |
| LOC105197056 | solute carrier family 2, facilitated glucose transporter member 8 [Source:RefSeq mRNA;Acc:XM_011163268.1] | 1.06625022<br>1  | 2.90E-05        |
| LOC105196621 | zinc carboxypeptidase-like [Source:RefSeq mRNA;Acc:XM_011162639.1]                                        | -3.98334266      | 3.12E-05        |
| LOC105206234 | chymotrypsin-1-like [Source:RefSeq mRNA;Acc:XM_011175743.1]                                               | 1.75248420<br>6  | 3.54E-05        |
| LOC105196064 | luciferin 4-monooxygenase-like [Source:RefSeq mRNA;Acc:XM_011161789.1]                                    | 1.21026578<br>5  | 4.69E-05        |
| LOC105199102 | venom metalloproteinase 3-like [Source:RefSeq mRNA;Acc:XM_011166059.1]                                    | -3.16474476      | 4.75E-05        |
| LOC105193273 | chymotrypsin-2-like [Source:RefSeq mRNA;Acc:XM_011157656.1]                                               | 1.34986291<br>1  | 4.94E-05        |
| LOC105202067 | XP_025988188.1 uncharacterized protein LOC105202067 isoform X1 [ <i>Solenopsis invicta</i> ]              | 1.13693427<br>6  | 6.06E-05        |
| LOC105206478 | aminopeptidase N-like [Source:RefSeq mRNA;Acc:XM_011175971.1]                                             | 1.75958638<br>9  | 6.46E-05        |
| LOC105208221 | XP_025991122.1 uncharacterized protein LOC105208221 isoform X2 [ <i>Solenopsis invicta</i> ]              | -1.30666134      | 7.01E-05        |
| LOC105200436 | probable serine/threonine-protein kinase kinX [Source:RefSeq mRNA;Acc:XM_011167990.1]                     | 1.05274146<br>2  | 7.16E-05        |
| LOC105203249 | XP_011170328.1 protein snakeskin [ <i>Solenopsis invicta</i> ]                                            | 1.08739529<br>6  | 7.94E-05        |
| MSTRG.15985  | PREDICTED: X-ray radiation resistance-associated protein 1-like isoform X1 [Amphimedon queenslandica]-    | 1.23138120<br>5  | 8.05E-05        |
| LOC105196158 | peptidoglycan-recognition protein 1-like, transcript variant X3 [Source:RefSeq mRNA;Acc:XM_011161931.1]   | 1.85066576<br>7  | 8.90E-05        |
| LOC105197690 | tRNA pseudouridine synthase-like 1 [Source:RefSeq mRNA;Acc:XM_011164178.1]                                | -1.02502079      | 9.44E-05        |
| LOC105203835 | lipase 3-like, transcript variant X2 [Source:RefSeq mRNA;Acc:XM_011172749.1]                              | 1.41658615<br>8  | 0.00010870<br>7 |
| LOC105206762 | KYM96908.1 hypothetical protein ALC62_12418 [Cyphomyrmex costatus]                                        | -1.58343987<br>1 | 0.00011654<br>1 |

|              |                                                                                                                             |                 |                 |
|--------------|-----------------------------------------------------------------------------------------------------------------------------|-----------------|-----------------|
| LOC105193038 | cilia- and flagella-associated protein 57 [Source:RefSeq mRNA;Acc:XM_011157359.1]                                           | -1.19286936     | 0.00011788<br>7 |
| LOC105193825 | XP_011156738.1 uncharacterized protein LOC105193825 [ <i>Solenopsis invicta</i> ]                                           | 1.14395759<br>5 | 0.00012018      |
| LOC105205116 | KMQ86092.1 pol polyprotein [ <i>Lasius niger</i> ]                                                                          | -1.2257802      | 0.00014464<br>1 |
| LOC105205254 | probable queuine tRNA-ribosyltransferase, transcript variant X1 [Source:RefSeq mRNA;Acc:XM_011174584.1]                     | -1.04350164     | 0.00014868<br>3 |
| LOC105203861 | microtubule-associated protein futsch-like [Source:RefSeq mRNA;Acc:XM_011172784.1]                                          | -1.60572106     | 0.00015340<br>5 |
| LOC105203631 | glucose dehydrogenase [FAD, quinone]-like [Source:RefSeq mRNA;Acc:XM_011172483.1]                                           | 1.47930775<br>9 | 0.00016772<br>8 |
| LOC105198257 | sodium-coupled monocarboxylate transporter 1-like, transcript variant X1 [Source:RefSeq mRNA;Acc:XM_011164923.1]            | -1.26859048     | 0.00016888      |
| LOC105197474 | protein lethal (2)denticleless, transcript variant X2 [Source:RefSeq mRNA;Acc:XM_011163856.1]                               | -1.11051245     | 0.00017029<br>3 |
| LOC105201115 | XP_011167307.1 uncharacterized protein LOC105201115 [ <i>Solenopsis invicta</i> ]                                           | -1.03703869     | 0.00018537<br>1 |
| LOC105204587 | transient receptor potential channel pyrexia-like [Source:RefSeq mRNA;Acc:XM_011173715.1]                                   | 1.29028960<br>4 | 0.00020226<br>1 |
| LOC105196270 | cytochrome c oxidase subunit NDUF4-like [Source:RefSeq mRNA;Acc:XM_011162094.1]                                             | 1.23698307<br>6 | 0.00021670<br>6 |
| LOC105205655 | XP_011173383.1 uncharacterized protein LOC105205655 isoform X1 [ <i>Solenopsis invicta</i> ]                                | -1.23104429     | 0.00023634<br>9 |
| LOC105198898 | trypsin-1-like [Source:RefSeq mRNA;Acc:XM_011165755.1]                                                                      | 1.57418253      | 0.0002486       |
| LOC105193417 | putative inorganic phosphate cotransporter [Source:RefSeq mRNA;Acc:XM_011157848.1]                                          | 1.00908000<br>8 | 0.00025935      |
| LOC105206675 | fatty acid synthase-like [Source:RefSeq mRNA;Acc:XM_011176157.1]                                                            | -1.01767189     | 0.00026212<br>9 |
| LOC105200664 | DDB1- and CUL4-associated factor 8-like, transcript variant X2 [Source:RefSeq mRNA;Acc:XM_011168315.1]                      | 1.46814883<br>6 | 0.00026576<br>1 |
| LOC105192853 | homeobox protein Hox-B1a [Source:RefSeq mRNA;Acc:XM_011157113.1]                                                            | 1.54382380<br>6 | 0.00029230<br>9 |
| LOC105203371 | putative aldehyde dehydrogenase family 7 member A1 homolog [Source:RefSeq mRNA;Acc:XM_011172161.1]                          | -1.02932764     | 0.00029624<br>5 |
| LOC105193131 | protein phosphatase 1 regulatory subunit 3C-B [Source:RefSeq mRNA;Acc:XM_011157475.1]                                       | -1.67542211     | 0.00031068<br>7 |
| LOC105196048 | putative leucine-rich repeat-containing protein DDB_G0290503, transcript variant X1 [Source:RefSeq mRNA;Acc:XM_011161769.1] | -1.43234036     | 0.00035326<br>4 |
| LOC105193432 | acetyl-CoA carboxylase [Source:RefSeq mRNA;Acc:XM_011157904.1]                                                              | -1.04436335     | 0.00035882<br>7 |
| LOC105199969 | COMM domain-containing protein 8-like [Source:RefSeq mRNA;Acc:XM_011167306.1]                                               | -1.12808613     | 0.00036772      |

|              |                                                                                                |                 |                 |
|--------------|------------------------------------------------------------------------------------------------|-----------------|-----------------|
| LOC105203377 | XP_011170469.1 uncharacterized protein LOC105203377 [ <i>Solenopsis invicta</i> ]              | 1.28968686<br>2 | 0.00036917<br>2 |
| LOC105207509 | aquaporin AQP Ae.a-like, transcript variant X1 [Source:RefSeq mRNA;Acc:XM_011177017.1]         | 1.06542921      | 0.00038357      |
| MSTRG.12133  | Putative ATP-dependent RNA and DNA helicase-                                                   | 1.17063099<br>4 | 0.00038451<br>1 |
| LOC105202163 | titin-like [Source:RefSeq mRNA;Acc:XM_011170554.1]                                             | -1.34264304     | 0.00041162<br>9 |
| LOC105203816 | MFS-type transporter SLC18B1-like [Source:RefSeq mRNA;Acc:XM_011172728.1]                      | -1.36872231     | 0.00047169<br>4 |
| MSTRG.10354  | kinectin isoform X9 [ <i>Solenopsis invicta</i> ]                                              | -1.19236495     | 0.00047925<br>9 |
| LOC105202373 | XP_011169150.1 uncharacterized protein LOC105202373 [ <i>Solenopsis invicta</i> ]              | 1.36960518<br>8 | 0.00049191<br>3 |
| LOC105207917 | ceramide phosphoethanolamine synthase-like [Source:RefSeq mRNA;Acc:XM_011177609.1]             | 1.53781140<br>7 | 0.00053173<br>8 |
| LOC105196039 | XP_011879492.1 PREDICTED: uncharacterized protein LOC105568426 isoform X1 [Vollenhovia emeryi] | 1.34481310<br>4 | 0.00053543<br>1 |
| LOC105194306 | myb-like protein V [Source:RefSeq mRNA;Acc:XM_011159157.1]                                     | -2.26282993     | 0.00054859<br>1 |
| LOC105203247 | XP_011170325.1 uncharacterized protein LOC105203247 isoform X1 [ <i>Solenopsis invicta</i> ]   | 1.29269738<br>4 | 0.00055600<br>9 |
| LOC105201798 | XP_011168300.1 uncharacterized protein LOC105201798 [ <i>Solenopsis invicta</i> ]              | 1.12764782<br>3 | 0.00072434<br>1 |
| LOC105203836 | lipase 3-like, transcript variant X1 [Source:RefSeq mRNA;Acc:XM_011172751.1]                   | 2.29768054<br>9 | 0.00073517<br>3 |
| LOC105203220 | XP_025991335.1 uncharacterized protein LOC113003954, partial [ <i>Solenopsis invicta</i> ]     | 1.42103624      | 0.00073793<br>5 |
| LOC105195412 | uricase [Source:RefSeq mRNA;Acc:XM_011160791.1]                                                | -1.02762754     | 0.00076168<br>4 |
| LOC105203831 | protein takeout-like [Source:RefSeq mRNA;Acc:XM_011172745.1]                                   | -1.33029646     | 0.00077172<br>5 |
| MSTRG.18297  | PREDICTED: fatty acid synthase [Wasmannia auropunctata]                                        | 1.19317228<br>2 | 0.00079502<br>4 |
| LOC105196519 | sterol O-acyltransferase 1-like [Source:RefSeq mRNA;Acc:XM_011162492.1]                        | 1.09052264<br>1 | 0.00081775<br>5 |
| LOC105196609 | glyoxylate reductase/hydroxypyruvate reductase-like [Source:RefSeq mRNA;Acc:XM_011162628.1]    | 1.12083677<br>6 | 0.0008271       |
| LOC105201912 | XP_1052011912 uncharacterized protein LOC105201912                                             | 2.55169821<br>5 | 0.00086778<br>3 |
| LOC105198307 | histone-lysine N-methyltransferase ASHR1-like [Source:RefSeq mRNA;Acc:XM_011164973.1]          | 1.05695588<br>5 | 0.00090683<br>4 |

|              |                                                                                                       |                 |                 |
|--------------|-------------------------------------------------------------------------------------------------------|-----------------|-----------------|
| LOC105204002 | phosphatidate phosphatase LPIN2, transcript variant X4 [Source:RefSeq mRNA;Acc:XM_011172979.1]        | 1.07417287<br>4 | 0.00092972<br>9 |
| LOC105197135 | XP_025995110.1 zinc finger CCCH domain-containing protein 13 isoform X1 [ <i>Solenopsis invicta</i> ] | 1.47852080<br>3 | 0.00100231<br>1 |
| MSTRG.12889  | PREDICTED _uncharacterized protein -                                                                  | 1.14535138<br>6 | 0.00112534<br>9 |
| LOC105195766 | TGZ50093.1 Mitoferrin-2 [Temnothorax longispinosus]                                                   | 1.00107144<br>1 | 0.00113334<br>2 |
| LOC105200774 | ornithine decarboxylase 2-like [Source:RefSeq mRNA;Acc:XM_011168485.1]                                | 1.27154590<br>6 | 0.00114265<br>5 |
| LOC105197687 | dual specificity protein phosphatase 19 [Source:RefSeq mRNA;Acc:XM_011164175.1]                       | -1.1250686      | 0.00117195<br>7 |
| LOC105193036 | pre-mRNA-splicing factor 38A [Source:RefSeq mRNA;Acc:XM_011157356.1]                                  | -1.03306475     | 0.00119464      |
| LOC105205814 | origin recognition complex subunit 2 [Source:RefSeq mRNA;Acc:XM_011175338.1]                          | -1.20984717     | 0.00128233      |
| LOC105193964 | myoblast determination protein 1 homolog [Source:RefSeq mRNA;Acc:XM_011158658.1]                      | 1.26273849<br>9 | 0.00130768<br>8 |
| LOC105205624 | XP_011173334.2 uncharacterized protein LOC105205624 [ <i>Solenopsis invicta</i> ]                     | -1.54252723     | 0.00130999<br>4 |
| LOC105206141 | cytosolic 10-formyltetrahydrofolate dehydrogenase [Source:RefSeq mRNA;Acc:XM_011175662.1]             | -3.22082461     | 0.00135493<br>1 |
| LOC105202300 | ras GTPase-activating-like protein IQGAP1 [Source:RefSeq mRNA;Acc:XM_011170747.1]                     | -1.44835757     | 0.00136607<br>9 |
| LOC105199942 | hydroxylysine kinase [Source:RefSeq mRNA;Acc:XM_011167275.1]                                          | 1.13305419<br>1 | 0.00144262<br>1 |
| LOC105205979 | glucose dehydrogenase [FAD, quinone]-like [Source:RefSeq mRNA;Acc:XM_011175512.1]                     | -1.32251088     | 0.00153654<br>1 |
| LOC105194706 | transmembrane protease serine 9-like [Source:RefSeq mRNA;Acc:XM_011159766.1]                          | 1.29721786<br>3 | 0.00155280<br>5 |
| LOC105200330 | synaptic vesicular amine transporter, transcript variant X1 [Source:RefSeq mRNA;Acc:XM_011167811.1]   | 1.68709528<br>6 | 0.00165653<br>4 |
| LOC105198569 | XP_011163623.1 uncharacterized protein LOC105198569 [ <i>Solenopsis invicta</i> ]                     | 1.01092973<br>1 | 0.00168142<br>6 |
| LOC105204001 | XP_011171278.1 uncharacterized protein LOC105204001 [ <i>Solenopsis invicta</i> ]                     | 1.32185305      | 0.00174860<br>8 |
| LOC105207621 | forkhead box protein D1 [Source:RefSeq mRNA;Acc:XM_011177180.1]                                       | -1.20281688     | 0.00179780<br>4 |
| LOC105201575 | XP_011167928.1 uncharacterized protein LOC105201575 isoform X1 [ <i>Solenopsis invicta</i> ]          | 1.41135245<br>2 | 0.00187014<br>5 |
| LOC105204314 | XP_011171665.1 uncharacterized protein LOC105204314 [ <i>Solenopsis invicta</i> ]                     | 1.05540629<br>9 | 0.00187157<br>4 |

|              |                                                                                                     |                 |                 |
|--------------|-----------------------------------------------------------------------------------------------------|-----------------|-----------------|
| LOC105200995 | XP_025995748.1 ETS-related transcription factor Elf-5-like isoform X1 [ <i>Solenopsis invicta</i> ] | -1.07757994     | 0.00188639<br>9 |
| LOC105201284 | cytochrome b5-related protein-like [Source:RefSeq mRNA;Acc:XM_011169236.1]                          | 1.95789816<br>7 | 0.00189918<br>7 |
| MSTRG.941    | gag-pol polyprotein precursor [ <i>Lasius niger</i> ]                                               | -1.32332133     | 0.00195161<br>4 |
| LOC105205276 | alpha-catulin-like [Source:RefSeq mRNA;Acc:XM_011174620.1]                                          | 1.40136256<br>2 | 0.00197077<br>5 |
| LOC105195453 | protein PBDC1, transcript variant X2 [Source:RefSeq mRNA;Acc:XM_011160850.1]                        | -1.30014024     | 0.00207335<br>1 |
| LOC105207975 | regulating synaptic membrane exocytosis protein 2 [Source:RefSeq mRNA;Acc:XM_011177679.1]           | 1.33051559<br>1 | 0.00209492<br>2 |
| LOC105195174 | probable serine hydrolase [Source:RefSeq mRNA;Acc:XM_011160463.1]                                   | 1.63161259<br>4 | 0.00220602<br>8 |

**Table S8.** List of KEGG pathways along with up-down regulated genes

| ID                                          | num | KEGG class                           | ID      | Description                                 | P-value  | Up | Down |
|---------------------------------------------|-----|--------------------------------------|---------|---------------------------------------------|----------|----|------|
| Metabolic pathways                          | 27  | Metabolism                           | ko01100 | Metabolic pathways                          | 0.016942 | 15 | 12   |
| Fatty acid metabolism                       | 8   | Metabolism                           | ko01212 | Fatty acid metabolism                       | 0.003007 | 2  | 6    |
| Insulin signaling pathway                   | 7   | Organismal Systems                   | ko04910 | Insulin signaling pathway                   | 0.002419 | 1  | 6    |
| Fatty acid biosynthesis                     | 6   | Metabolism                           | ko00061 | Fatty acid biosynthesis                     | 0.000978 | 1  | 5    |
| AMPK signaling pathway                      | 6   | Environmental Information Processing | ko04152 | AMPK signaling pathway                      | 0.01799  | 1  | 5    |
| Pyruvate metabolism                         | 3   | Metabolism                           | ko00620 | Pyruvate metabolism                         | 0.016328 | 1  | 2    |
| Cell cycle                                  | 2   | Cellular Processes                   | ko04110 | Cell cycle                                  | 0.310707 | 0  | 2    |
| Protein processing in endoplasmic reticulum | 2   | Genetic Information Processing       | ko04141 | Protein processing in endoplasmic reticulum | 0.539698 | 0  | 2    |
| Protein digestion and absorption            | 6   | Organismal Systems                   | ko04974 | Protein digestion and absorption            | 0.000755 | 5  | 1    |
| Pancreatic secretion                        | 6   | Organismal Systems                   | ko04972 | Pancreatic secretion                        | 0.001574 | 5  | 1    |
| Lysine degradation                          | 5   | Metabolism                           | ko00310 | Lysine degradation                          | 0.004016 | 4  | 1    |
| Glycine, serine and threonine metabolism    | 2   | Metabolism                           | ko00260 | Glycine, serine and threonine metabolism    | 0.084269 | 1  | 1    |
| Arginine and proline metabolism             | 2   | Metabolism                           | ko00330 | Arginine and proline metabolism             | 0.092699 | 1  | 1    |
| Ascorbate and aldarate metabolism           | 2   | Metabolism                           | ko00053 | Ascorbate and aldarate metabolism           | 0.097003 | 1  | 1    |

|                                         |   |                    |         |                                         |          |   |   |
|-----------------------------------------|---|--------------------|---------|-----------------------------------------|----------|---|---|
| Dilated cardiomyopathy (DCM)            | 2 | Human Diseases     | ko05414 | Dilated cardiomyopathy (DCM)            | 0.138013 | 1 | 1 |
| Glycerolipid metabolism                 | 2 | Metabolism         | ko00561 | Glycerolipid metabolism                 | 0.142782 | 1 | 1 |
| Hypertrophic cardiomyopathy (HCM)       | 2 | Human Diseases     | ko05410 | Hypertrophic cardiomyopathy (HCM)       | 0.142782 | 1 | 1 |
| Biosynthesis of unsaturated fatty acids | 2 | Metabolism         | ko01040 | Biosynthesis of unsaturated fatty acids | 0.269286 | 1 | 1 |
| Oxidative phosphorylation               | 2 | Metabolism         | ko00190 | Oxidative phosphorylation               | 0.500546 | 1 | 1 |
| Lipoic acid metabolism                  | 1 | Metabolism         | ko00785 | Lipoic acid metabolism                  | 0.054415 | 0 | 1 |
| Histidine metabolism                    | 1 | Metabolism         | ko00340 | Histidine metabolism                    | 0.093305 | 0 | 1 |
| Taurine and hypotaurine metabolism      | 1 | Metabolism         | ko00430 | Taurine and hypotaurine metabolism      | 0.105915 | 0 | 1 |
| Caffeine metabolism                     | 1 | Metabolism         | ko00232 | Caffeine metabolism                     | 0.13062  | 0 | 1 |
| Antigen processing and presentation     | 1 | Organismal Systems | ko04612 | Antigen processing and presentation     | 0.154653 | 0 | 1 |
| One carbon pool by folate               | 1 | Metabolism         | ko00670 | One carbon pool by folate               | 0.166424 | 0 | 1 |
| Thiamine metabolism                     | 1 | Metabolism         | ko00730 | Thiamine metabolism                     | 0.166424 | 0 | 1 |
| Folate biosynthesis                     | 1 | Metabolism         | ko00790 | Folate biosynthesis                     | 0.275609 | 0 | 1 |
| p53 signaling pathway                   | 1 | Cellular Processes | ko04115 | p53 signaling pathway                   | 0.275609 | 0 | 1 |
| IL-17 signaling pathway                 | 1 | Organismal Systems | ko04657 | IL-17 signaling pathway                 | 0.31523  | 0 | 1 |
| Th17 cell differentiation               | 1 | Organismal Systems | ko04659 | Th17 cell differentiation               | 0.324797 | 0 | 1 |
| Tryptophan metabolism                   | 1 | Metabolism         | ko00380 | Tryptophan metabolism                   | 0.343539 | 0 | 1 |



|                                            |   |                    |         |                                            |          |   |   |
|--------------------------------------------|---|--------------------|---------|--------------------------------------------|----------|---|---|
| Valine, leucine and isoleucine degradation | 1 | Metabolism         | ko00280 | Valine, leucine and isoleucine degradation | 0.388184 | 0 | 1 |
| beta-Alanine metabolism                    | 1 | Metabolism         | ko00410 | beta-Alanine metabolism                    | 0.421738 | 0 | 1 |
| Propanoate metabolism                      | 1 | Metabolism         | ko00640 | Propanoate metabolism                      | 0.45348  | 0 | 1 |
| Fatty acid degradation                     | 1 | Metabolism         | ko00071 | Fatty acid degradation                     | 0.476156 | 0 | 1 |
| Glycolysis / Gluconeogenesis               | 1 | Metabolism         | ko00010 | Glycolysis / Gluconeogenesis               | 0.497905 | 0 | 1 |
| Progesterone-mediated oocyte maturation    | 1 | Organismal Systems | ko04914 | Progesterone-mediated oocyte maturation    | 0.497905 | 0 | 1 |
| Necroptosis                                | 1 | Cellular Processes | ko04217 | Necroptosis                                | 0.504956 | 0 | 1 |
| NOD-like receptor signaling pathway        | 1 | Organismal Systems | ko04621 | NOD-like receptor signaling pathway        | 0.511909 | 0 | 1 |
| Prostate cancer                            | 1 | Human Diseases     | ko05215 | Prostate cancer                            | 0.538774 | 0 | 1 |
| Insulin resistance                         | 1 | Human Diseases     | ko04931 | Insulin resistance                         | 0.54526  | 0 | 1 |
| Transcriptional misregulation in cancers   | 1 | Human Diseases     | ko05202 | Transcriptional misregulation in cancers   | 0.564183 | 0 | 1 |
| Fluid shear stress and atherosclerosis     | 1 | Human Diseases     | ko05418 | Fluid shear stress and atherosclerosis     | 0.564183 | 0 | 1 |
| Glucagon signaling pathway                 | 1 | Organismal Systems | ko04922 | Glucagon signaling pathway                 | 0.605377 | 0 | 1 |
| Estrogen signaling pathway                 | 1 | Organismal Systems | ko04915 | Estrogen signaling pathway                 | 0.621837 | 0 | 1 |

|                                                     |   |                                      |         |                                                     |          |   |   |
|-----------------------------------------------------|---|--------------------------------------|---------|-----------------------------------------------------|----------|---|---|
| Cellular senescence                                 | 1 | Cellular Processes                   | ko04218 | Cellular senescence                                 | 0.647781 | 0 | 1 |
| Human immunodeficiency virus 1 infection            | 1 | Human Diseases                       | ko05170 | Human immunodeficiency virus 1 infection            | 0.698851 | 0 | 1 |
| Viral carcinogenesis                                | 1 | Human Diseases                       | ko05203 | Viral carcinogenesis                                | 0.731346 | 0 | 1 |
| Purine metabolism                                   | 1 | Metabolism                           | ko00230 | Purine metabolism                                   | 0.746275 | 0 | 1 |
| Salmonella infection                                | 1 | Human Diseases                       | ko05132 | Salmonella infection                                | 0.776944 | 0 | 1 |
| Spliceosome                                         | 1 | Genetic Information Processing       | ko03040 | Spliceosome                                         | 0.806755 | 0 | 1 |
| PI3K-Akt signaling pathway                          | 1 | Environmental Information Processing | ko04151 | PI3K-Akt signaling pathway                          | 0.814908 | 0 | 1 |
| HTLV-I infection                                    | 1 | Human Diseases                       | ko05166 | HTLV-I infection                                    | 0.852999 | 0 | 1 |
| Pathways in cancer                                  | 1 | Human Diseases                       | ko05200 | Pathways in cancer                                  | 0.953481 | 0 | 1 |
| Neuroactive ligand-receptor interaction             | 5 | Environmental Information Processing | ko04080 | Neuroactive ligand-receptor interaction             | 0.013525 | 5 | 0 |
| Influenza A                                         | 5 | Human Diseases                       | ko05164 | Influenza A                                         | 0.018855 | 5 | 0 |
| Lysosome                                            | 5 | Cellular Processes                   | ko04142 | Lysosome                                            | 0.041495 | 5 | 0 |
| Steroid biosynthesis                                | 4 | Metabolism                           | ko00100 | Steroid biosynthesis                                | 0.003277 | 4 | 0 |
| Cholesterol metabolism                              | 4 | Organismal Systems                   | ko04979 | Cholesterol metabolism                              | 0.013444 | 4 | 0 |
| Ubiquinone and other terpenoid-quinone biosynthesis | 2 | Metabolism                           | ko00130 | Ubiquinone and other terpenoid-quinone biosynthesis | 0.092699 | 2 | 0 |
| Signaling pathways                                  | 2 | Cellular Processes                   | ko04550 | Signaling pathways regulating                       | 0.17208  | 2 | 0 |

|                                                        |   |                                      |         |                                                        |          |   |   |
|--------------------------------------------------------|---|--------------------------------------|---------|--------------------------------------------------------|----------|---|---|
| regulating pluripotency of stem cells                  |   |                                      |         | pluripotency of stem cells                             |          |   |   |
| Toll and Imd signaling pathway                         | 2 | Organismal Systems                   | ko04624 | Toll and Imd signaling pathway                         | 0.17706  | 2 | 0 |
| Drug metabolism - other enzymes                        | 2 | Metabolism                           | ko00983 | Drug metabolism - other enzymes                        | 0.310707 | 2 | 0 |
| Parkinson disease                                      | 2 | Human Diseases                       | ko05012 | Parkinson disease                                      | 0.371895 | 2 | 0 |
| Maturity onset diabetes of the young                   | 1 | Human Diseases                       | ko04950 | Maturity onset diabetes of the young                   | 0.105915 | 1 | 0 |
| Cytokine-cytokine receptor interaction                 | 1 | Environmental Information Processing | ko04060 | Cytokine-cytokine receptor interaction                 | 0.189483 | 1 | 0 |
| Galactose metabolism                                   | 1 | Metabolism                           | ko00052 | Galactose metabolism                                   | 0.233735 | 1 | 0 |
| Starch and sucrose metabolism                          | 1 | Metabolism                           | ko00500 | Starch and sucrose metabolism                          | 0.254961 | 1 | 0 |
| Pentose phosphate pathway                              | 1 | Metabolism                           | ko00030 | Pentose phosphate pathway                              | 0.295693 | 1 | 0 |
| ECM-receptor interaction                               | 1 | Environmental Information Processing | ko04512 | ECM-receptor interaction                               | 0.31523  | 1 | 0 |
| Arrhythmogenic right ventricular cardiomyopathy (ARVC) | 1 | Human Diseases                       | ko05412 | Arrhythmogenic right ventricular cardiomyopathy (ARVC) | 0.324797 | 1 | 0 |
| Glyoxylate and                                         | 1 | Metabolism                           | ko00630 | Glyoxylate and dicarboxylate                           | 0.343539 | 1 | 0 |

|                                              |   |                    |         |                                              |          |   |   |
|----------------------------------------------|---|--------------------|---------|----------------------------------------------|----------|---|---|
| dicarboxylate metabolism                     |   |                    |         | metabolism                                   |          |   |   |
| Cocaine addiction                            | 1 | Human Diseases     | ko05030 | Cocaine addiction                            | 0.352717 | 1 | 0 |
| Steroid hormone biosynthesis                 | 1 | Metabolism         | ko00140 | Steroid hormone biosynthesis                 | 0.388184 | 1 | 0 |
| Pentose and glucuronate interconversions     | 1 | Metabolism         | ko00040 | Pentose and glucuronate interconversions     | 0.437829 | 1 | 0 |
| Serotonergic synapse                         | 1 | Organismal Systems | ko04726 | Serotonergic synapse                         | 0.437829 | 1 | 0 |
| Chemical carcinogenesis                      | 1 | Human Diseases     | ko05204 | Chemical carcinogenesis                      | 0.437829 | 1 | 0 |
| Synaptic vesicle cycle                       | 1 | Organismal Systems | ko04721 | Synaptic vesicle cycle                       | 0.461144 | 1 | 0 |
| Cardiac muscle contraction                   | 1 | Organismal Systems | ko04260 | Cardiac muscle contraction                   | 0.468702 | 1 | 0 |
| Insulin secretion                            | 1 | Organismal Systems | ko04911 | Insulin secretion                            | 0.468702 | 1 | 0 |
| Drug metabolism - cytochrome P450            | 1 | Metabolism         | ko00982 | Drug metabolism - cytochrome P450            | 0.476156 | 1 | 0 |
| Metabolism of xenobiotics by cytochrome P450 | 1 | Metabolism         | ko00980 | Metabolism of xenobiotics by cytochrome P450 | 0.490756 | 1 | 0 |
| Amphetamine addiction                        | 1 | Human Diseases     | ko05031 | Amphetamine addiction                        | 0.490756 | 1 | 0 |
| Porphyrin and chlorophyll metabolism         | 1 | Metabolism         | ko00860 | Porphyrin and chlorophyll metabolism         | 0.511909 | 1 | 0 |
| Glycerophospholipid metabolism               | 1 | Metabolism         | ko00564 | Glycerophospholipid metabolism               | 0.576366 | 1 | 0 |
| Retinol metabolism                           | 1 | Metabolism         | ko00830 | Retinol metabolism                           | 0.582332 | 1 | 0 |
| Inflammatory mediator                        | 1 | Organismal Systems | ko04750 | Inflammatory mediator regulation             | 0.588214 | 1 | 0 |

|                                           |   |                                      |         |                                           |          |   |   |
|-------------------------------------------|---|--------------------------------------|---------|-------------------------------------------|----------|---|---|
| regulation of TRP channels                |   |                                      |         | of TRP channels                           |          |   |   |
| Retrograde endocannabinoid signaling      | 1 | Organismal Systems                   | ko04723 | Retrograde endocannabinoid signaling      | 0.605377 | 1 | 0 |
| Adrenergic signaling in cardiomyocytes    | 1 | Organismal Systems                   | ko04261 | Adrenergic signaling in cardiomyocytes    | 0.632432 | 1 | 0 |
| Dopaminergic synapse                      | 1 | Organismal Systems                   | ko04728 | Dopaminergic synapse                      | 0.632432 | 1 | 0 |
| Alcoholism                                | 1 | Human Diseases                       | ko05034 | Alcoholism                                | 0.642736 | 1 | 0 |
| Oxytocin signaling pathway                | 1 | Organismal Systems                   | ko04921 | Oxytocin signaling pathway                | 0.647781 | 1 | 0 |
| Glutathione metabolism                    | 1 | Metabolism                           | ko00480 | Glutathione metabolism                    | 0.67661  | 1 | 0 |
| Non-alcoholic fatty liver disease (NAFLD) | 1 | Human Diseases                       | ko04932 | Non-alcoholic fatty liver disease (NAFLD) | 0.742621 | 1 | 0 |
| mTOR signaling pathway                    | 1 | Environmental Information Processing | ko04150 | mTOR signaling pathway                    | 0.75343  | 1 | 0 |
| Proteoglycans in cancer                   | 1 | Human Diseases                       | ko05205 | Proteoglycans in cancer                   | 0.76715  | 1 | 0 |
| MAPK signaling pathway                    | 1 | Environmental Information Processing | ko04010 | MAPK signaling pathway                    | 0.792375 | 1 | 0 |
| Peroxisome                                | 1 | Cellular Processes                   | ko04146 | Peroxisome                                | 0.83739  | 1 | 0 |
| Thermogenesis                             | 1 | Organismal Systems                   | ko04714 | Thermogenesis                             | 0.889921 | 1 | 0 |
| Alzheimer disease                         | 1 | Human Diseases                       | ko05010 | Alzheimer disease                         | 0.937623 | 1 | 0 |
| Huntington disease                        | 1 | Human Diseases                       | ko05016 | Huntington disease                        | 0.9437   | 1 | 0 |

**Table S9.** List of gene ontology (GO) terms along with up and down-regulated genes

| GO ID (level1) | GO Term (level1)   | GO ID (level2) | GO Term (level2)                              | number_of_Ind-C-vs-Ind-30 (up) | number_of_Ind-C-vs-Ind-30 (down) |
|----------------|--------------------|----------------|-----------------------------------------------|--------------------------------|----------------------------------|
| GO:0008150     | Biological Process | GO:0008152     | metabolic process                             | 33                             | 18                               |
| GO:0008150     | Biological Process | GO:0022610     | biological adhesion                           | 2                              | 0                                |
| GO:0008150     | Biological Process | GO:0002376     | immune system process                         | 1                              | 0                                |
| GO:0008150     | Biological Process | GO:0051179     | localization                                  | 9                              | 2                                |
| GO:0008150     | Biological Process | GO:0032502     | developmental process                         | 1                              | 0                                |
| GO:0008150     | Biological Process | GO:0023052     | signaling                                     | 4                              | 1                                |
| GO:0008150     | Biological Process | GO:0050896     | response to stimulus                          | 5                              | 1                                |
| GO:0008150     | Biological Process | GO:0050789     | regulation of biological process              | 8                              | 2                                |
| GO:0008150     | Biological Process | GO:0065007     | biological regulation                         | 8                              | 2                                |
| GO:0008150     | Biological Process | GO:0032501     | multicellular organismal process              | 2                              | 0                                |
| GO:0008150     | Biological Process | GO:0071840     | cellular component organization or biogenesis | 1                              | 0                                |
| GO:0008150     | Biological Process | GO:0009987     | cellular process                              | 16                             | 14                               |
| GO:0003674     | Molecular Function | GO:0003824     | catalytic activity                            | 30                             | 19                               |
| GO:0003674     | Molecular Function | GO:0098772     | molecular function regulator                  | 3                              | 1                                |
| GO:0003674     | Molecular Function | GO:0005215     | transporter activity                          | 6                              | 1                                |
| GO:0003674     | Molecular Function | GO:0140110     | transcription regulator activity              | 1                              | 1                                |
| GO:0003674     | Molecular Function | GO:0005488     | binding                                       | 30                             | 20                               |
| GO:0003674     | Molecular Function | GO:0060089     | molecular transducer activity                 | 1                              | 0                                |
| GO:0005575     | Cellular Component | GO:0044425     | membrane part                                 | 12                             | 3                                |
| GO:0005575     | Cellular Component | GO:0016020     | membrane                                      | 16                             | 5                                |
| GO:0005575     | Cellular Component | GO:0005576     | extracellular region                          | 3                              | 0                                |
| GO:0005575     | Cellular Component | GO:0043226     | organelle                                     | 3                              | 2                                |
| GO:0005575     | Cellular Component | GO:0044422     | organelle part                                | 0                              | 1                                |
| GO:0005575     | Cellular Component | GO:0044464     | cell part                                     | 4                              | 4                                |
| GO:0005575     | Cellular Component | GO:0005623     | cell                                          | 4                              | 4                                |
| GO:0005575     | Cellular Component | GO:0032991     | protein-containing complex                    | 1                              | 1                                |
